# Supplementary material
Source: MDPI journal article supplement (https://www.mdpi.com/2071-1050/13/17/9966)
Supplement: s1 [file s1]

Questionnaire about the indoor environment and Thermal Comfort for traditional historic stilt house, a Case of Dong Minority Dwelling during summer

Thank you very much for your participation. The following questionnaire is about the building performance survey, which is conducted by Guanxi Key Laboratory of New Energy and Building Energy Saving Guilin University of Technology. Your feedback is very valuable for us to evaluate and improve the building performance.

The survey is completely anonymous, we assure you your personal information will be kept strictly confidential. Thank you again for your cooperation.

1.Gender: [\[Single choice questions\]](#)

| Option               | Subtotal | Proportion                    |
|----------------------|----------|-------------------------------|
| Male                 | 209      | <div><div></div></div> 44.28% |
| Female               | 260      | <div><div></div></div> 55.08% |
| Invalid              | 3        | <div><div></div></div> 0.64%  |
| Total questionnaires | 472      |                               |

2.Age: [\[Single choice questions\]](#)

| Option               | Subtotal | Proportion                    |
|----------------------|----------|-------------------------------|
| Less than 30         | 117      | <div><div></div></div> 24.79% |
| 31~40                | 102      | <div><div></div></div> 21.61% |
| 41~50                | 102      | <div><div></div></div> 21.61% |
| 51~60                | 67       | <div><div></div></div> 14.19% |
| Over 60              | 81       | <div><div></div></div> 17.16% |
| Invalid              | 3        | <div><div></div></div> 0.64%  |
| Total questionnaires | 472      |                               |

3.Your current dress:

Top, Bottom, Skirt, Shoes and socks[\[Multiple choice questions\]](#)

| Option                     | Subtotal | Proportion                    |
|----------------------------|----------|-------------------------------|
| Long-sleeved T-shirt       | 17       | <div><div></div></div> 3.6%   |
| Short-sleeved T-shirt      | 335      | <div><div></div></div> 70.97% |
| Long-sleeved shirt         | 18       | <div><div></div></div> 3.81%  |
| Short-sleeved shirt        | 42       | <div><div></div></div> 8.9%   |
| Suit pants                 | 49       | <div><div></div></div> 10.38% |
| Jean                       | 52       | <div><div></div></div> 11.02% |
| Pants                      | 259      | <div><div></div></div> 54.87% |
| Slim skirt                 | 38       | <div><div></div></div> 8.05%  |
| Dress                      | 53       | <div><div></div></div> 11.23% |
| Anklet                     | 14       | <div><div></div></div> 2.97%  |
| Stocking                   | 7        | <div><div></div></div> 1.48%  |
| Leather shoes/sports shoes | 56       | <div><div></div></div> 11.86% |
| Sandal/slipper             | 337      | <div><div></div></div> 71.4%  |

|                      |     |                              |
|----------------------|-----|------------------------------|
| Invalid              | 5   | <div><div></div></div> 1.06% |
| Total questionnaires | 472 |                              |

4.Hong long have you been living in this building: [\[Single choice questions\]](#)

| Option               | Subtotal | Proportion                    |
|----------------------|----------|-------------------------------|
| Less than 1 year     | 20       | <div><div></div></div> 4.24%  |
| 1-3years             | 83       | <div><div></div></div> 17.58% |
| 4-6years             | 72       | <div><div></div></div> 15.25% |
| Over 6years          | 292      | <div><div></div></div> 61.86% |
| Invalid              | 5        | <div><div></div></div> 1.06%  |
| Total questionnaires | 472      |                               |

5.How much time do you usually spend at home in a week: [\[Single choice questions\]](#)

| Option               | Subtotal | Proportion                    |
|----------------------|----------|-------------------------------|
| Less than 40 hours   | 27       | <div><div></div></div> 5.72%  |
| 40-55 hours          | 42       | <div><div></div></div> 8.9%   |
| 55-70 hours          | 81       | <div><div></div></div> 17.16% |
| Over 70 hours        | 317      | <div><div></div></div> 67.16% |
| Invalid              | 5        | <div><div></div></div> 1.06%  |
| Total questionnaires | 472      |                               |

6. The type of house you live in: [\[Single choice questions\]](#)

| Option                                                            | Subtotal | Proportion                    |
|-------------------------------------------------------------------|----------|-------------------------------|
| Traditional Historic Stilt House in North Guangxi (Pile-Dwelling) | 134      | <div><div></div></div> 28.39% |
| Traditional Historic Semi-Stilt House in North Guangxi            | 172      | <div><div></div></div> 36.44% |
| Reinforced Concrete Building                                      | 163      | <div><div></div></div> 34.53% |
| Invalid                                                           | 3        | <div><div></div></div> 0.64%  |
| Total questionnaires                                              | 472      |                               |

7. Do you think it is necessary for the house to be raised on stilts [\[Scale questions\]](#)

Average score: 0.71

| Option                 | Subtotal | Proportion                    |
|------------------------|----------|-------------------------------|
| There must be          | 117      | <div><div></div></div> 24.79% |
| It is better for       | 157      | <div><div></div></div> 33.26% |
| No idea                | 144      | <div><div></div></div> 30.51% |
| It is not necessary to | 40       | <div><div></div></div> 8.47%  |
| There must be no       | 9        | <div><div></div></div> 1.91%  |
| Invalid                | 5        | <div><div></div></div> 1.06%  |
| Total questionnaires   | 472      |                               |

8. Do you think it is necessary for the house of the entrance corridor? [\[Scale questions\]](#)

Average score: 0.75

| Option                 | Subtotal | Proportion                    |
|------------------------|----------|-------------------------------|
| There must be          | 108      | <div><div></div></div> 22.88% |
| It is better for       | 171      | <div><div></div></div> 36.23% |
| No idea                | 156      | <div><div></div></div> 33.05% |
| It is not necessary to | 26       | <div><div></div></div> 5.51%  |
| There must be no       | 6        | <div><div></div></div> 1.27%  |
| Invalid                | 5        | <div><div></div></div> 1.06%  |
| Total questionnaires   | 472      |                               |

9. Do you think it is necessary for the house of the fire pool? [\[Scale questions\]](#)

Average score: 0.39

| Option                 | Subtotal | Proportion                    |
|------------------------|----------|-------------------------------|
| There must be          | 72       | <div><div></div></div> 15.25% |
| It is better for       | 149      | <div><div></div></div> 31.57% |
| No idea                | 154      | <div><div></div></div> 32.63% |
| It is not necessary to | 71       | <div><div></div></div> 15.04% |
| There must be no       | 21       | <div><div></div></div> 4.45%  |
| Invalid                | 5        | <div><div></div></div> 1.06%  |
| Total questionnaires   | 472      |                               |

10. How many bedrooms are there? [\[Single choice questions\]](#)

| Option               | Subtotal | Proportion                    |
|----------------------|----------|-------------------------------|
| 1                    | 20       | <div><div></div></div> 4.24%  |
| 2                    | 36       | <div><div></div></div> 7.63%  |
| 3                    | 68       | <div><div></div></div> 14.41% |
| 4                    | 124      | <div><div></div></div> 26.27% |
| 5                    | 64       | <div><div></div></div> 13.56% |
| 6                    | 38       | <div><div></div></div> 8.05%  |
| Over 6               | 115      | <div><div></div></div> 24.36% |
| Invalid              | 7        | <div><div></div></div> 1.48%  |
| Total questionnaires | 472      |                               |

11. What’s the orientation and number of windows in your house: [\[Multiple choice questions\]](#)

| The title \ options    | None     | East        | South       | West        | North       | Invalid  |
|------------------------|----------|-------------|-------------|-------------|-------------|----------|
| Number and orientation | 6(1.27%) | 203(43.01%) | 325(68.86%) | 191(40.47%) | 131(27.75%) | 8(1.69%) |

12. Do you think the individual control of the environment, including indoor air quality, thermal, lighting and acoustic environment, is important for you: [\[Scale questions\]](#)

Average score: 0.75

| Option                  | Subtotal | Proportion                   |
|-------------------------|----------|------------------------------|
| No, it is not important | 7        | <div><div></div></div> 1.48% |

|                      |     |                               |
|----------------------|-----|-------------------------------|
| No idea              | 99  | <div><div></div></div> 20.97% |
| Yes, it is important | 350 | <div><div></div></div> 74.15% |
| Invalid              | 16  | <div><div></div></div> 3.39%  |
| Total questionnaires | 472 |                               |

13. What was your activity status during the first 30 minutes of filling out the questionnaire? [\[Single choice questions\]](#)

| Option               | Subtotal | Proportion                    |
|----------------------|----------|-------------------------------|
| Lying                | 10       | <div><div></div></div> 2.12%  |
| Site                 | 195      | <div><div></div></div> 41.31% |
| Occasionally walk    | 178      | <div><div></div></div> 37.71% |
| Standing             | 55       | <div><div></div></div> 11.65% |
| Strenuous exercise   | 26       | <div><div></div></div> 5.51%  |
| Invalid              | 8        | <div><div></div></div> 1.69%  |
| Total questionnaires | 472      |                               |

14. Physical parameters when filling in the questionnaire:

0.1 meters in height [\[Matrix text questions\]](#)

15. Physical parameters when filling in the questionnaire:

0.6 meters in height [\[Matrix text questions\]](#)

16. Physical parameters when filling in the questionnaire:

1.1 meters in height [\[Matrix text questions\]](#)

17. How satisfied are you with the overall indoor thermal environment in terms of temperature, humidity, wind speed etc.? [\[Scale questions\]](#)

**Average score: 1.19**

| Option               | Subtotal | Proportion                    |
|----------------------|----------|-------------------------------|
| Very dissatisfied    | 1        | <div><div></div></div> 0.21%  |
| 2                    | 6        | <div><div></div></div> 1.27%  |
| 3                    | 28       | <div><div></div></div> 5.93%  |
| 4                    | 65       | <div><div></div></div> 13.77% |
| 5                    | 179      | <div><div></div></div> 37.92% |
| 6                    | 148      | <div><div></div></div> 31.36% |
| Very satisfied       | 41       | <div><div></div></div> 8.69%  |
| Invalid              | 4        | <div><div></div></div> 0.85%  |
| Total questionnaires | 472      |                               |

18. How satisfied are you with the indoor air quality in terms of freshness, cleanliness, odor etc.? [\[Scale questions\]](#)

**Average score: 1.18**

| Option            | Subtotal | Proportion                    |
|-------------------|----------|-------------------------------|
| Very dissatisfied | 0        | <div><div></div></div> 0%     |
| 2                 | 4        | <div><div></div></div> 0.85%  |
| 3                 | 27       | <div><div></div></div> 5.72%  |
| 4                 | 66       | <div><div></div></div> 13.98% |
| 5                 | 202      | <div><div></div></div> 42.8%  |
| 6                 | 123      | <div><div></div></div> 26.06% |

|                      |     |                              |
|----------------------|-----|------------------------------|
| Very satisfied       | 46  | <div><div></div></div> 9.75% |
| Invalid              | 4   | <div><div></div></div> 0.85% |
| Total questionnaires | 472 |                              |

19. How satisfied are you with the current light environment in terms of glare prevention, brightness etc? [\[Scale questions\]](#)  
**Average score: 0.95**

| Option               | Subtotal | Proportion                    |
|----------------------|----------|-------------------------------|
| Very dissatisfied    | 4        | <div><div></div></div> 0.85%  |
| 2                    | 10       | <div><div></div></div> 2.12%  |
| 3                    | 59       | <div><div></div></div> 12.5%  |
| 4                    | 58       | <div><div></div></div> 12.29% |
| 5                    | 180      | <div><div></div></div> 38.14% |
| 6                    | 116      | <div><div></div></div> 24.58% |
| Very satisfied       | 42       | <div><div></div></div> 8.9%   |
| Invalid              | 3        | <div><div></div></div> 0.64%  |
| Total questionnaires | 472      |                               |

20. How satisfied are you with the acoustic environment in terms of noise, privacy of conversation etc.? [\[Scale questions\]](#)  
**Average score: 0.53**

| Option               | Subtotal | Proportion                    |
|----------------------|----------|-------------------------------|
| Very dissatisfied    | 4        | <div><div></div></div> 0.85%  |
| 2                    | 38       | <div><div></div></div> 8.05%  |
| 3                    | 85       | <div><div></div></div> 18.01% |
| 4                    | 73       | <div><div></div></div> 15.47% |
| 5                    | 138      | <div><div></div></div> 29.24% |
| 6                    | 100      | <div><div></div></div> 21.19% |
| Very satisfied       | 28       | <div><div></div></div> 5.93%  |
| Invalid              | 6        | <div><div></div></div> 1.27%  |
| Total questionnaires | 472      |                               |

21. How satisfied are you with the overall indoor environment by overall consideration of indoor thermal environment, the indoor air quality, the light environment, the acoustic environment in winter? [\[Scale questions\]](#)  
**Average score: 1.13**

| Option               | Subtotal | Proportion                    |
|----------------------|----------|-------------------------------|
| Very dissatisfied    | 0        | <div><div></div></div> 0%     |
| 2                    | 7        | <div><div></div></div> 1.48%  |
| 3                    | 27       | <div><div></div></div> 5.72%  |
| 4                    | 72       | <div><div></div></div> 15.25% |
| 5                    | 188      | <div><div></div></div> 39.83% |
| 6                    | 140      | <div><div></div></div> 29.66% |
| Very satisfied       | 35       | <div><div></div></div> 7.42%  |
| Invalid              | 3        | <div><div></div></div> 0.64%  |
| Total questionnaires | 472      |                               |

22. How satisfied are you by only considering the current thermal comfort (summer)? [\[Scale questions\]](#)

Average score: 0.9

| Option               | Subtotal | Proportion         |
|----------------------|----------|--------------------|
| Very dissatisfied    | 2        | <div></div> 0.42%  |
| 2                    | 13       | <div></div> 2.75%  |
| 3                    | 59       | <div></div> 12.5%  |
| 4                    | 57       | <div></div> 12.08% |
| 5                    | 200      | <div></div> 42.37% |
| 6                    | 105      | <div></div> 22.25% |
| Very satisfied       | 34       | <div></div> 7.2%   |
| Invalid              | 2        | <div></div> 0.42%  |
| Total questionnaires | 472      |                    |

23. How satisfied are you by only consideration of the air quality? [\[Scale questions\]](#)

Average score: 1.12

| Option               | Subtotal | Proportion         |
|----------------------|----------|--------------------|
| Very dissatisfied    | 1        | <div></div> 0.21%  |
| 2                    | 6        | <div></div> 1.27%  |
| 3                    | 36       | <div></div> 7.63%  |
| 4                    | 66       | <div></div> 13.98% |
| 5                    | 189      | <div></div> 40.04% |
| 6                    | 115      | <div></div> 24.36% |
| Very satisfied       | 51       | <div></div> 10.81% |
| Invalid              | 8        | <div></div> 1.69%  |
| Total questionnaires | 472      |                    |

24. How satisfied are you by only consideration of the light environment (glare prevention, brightness) of the room? [\[Scale questions\]](#)

Average score: 0.89

| Option               | Subtotal | Proportion         |
|----------------------|----------|--------------------|
| Very dissatisfied    | 6        | <div></div> 1.27%  |
| 2                    | 8        | <div></div> 1.69%  |
| 3                    | 59       | <div></div> 12.5%  |
| 4                    | 65       | <div></div> 13.77% |
| 5                    | 175      | <div></div> 37.08% |
| 6                    | 123      | <div></div> 26.06% |
| Very satisfied       | 29       | <div></div> 6.14%  |
| Invalid              | 7        | <div></div> 1.48%  |
| Total questionnaires | 472      |                    |

25. How satisfied are you with the acoustic environment only? [\[Scale questions\]](#)

Average score: 0.44

| Option            | Subtotal | Proportion        |
|-------------------|----------|-------------------|
| Very dissatisfied | 10       | <div></div> 2.12% |
| 2                 | 30       | <div></div> 6.36% |

|                      |     |                               |
|----------------------|-----|-------------------------------|
| 3                    | 85  | <div><div></div></div> 18.01% |
| 4                    | 89  | <div><div></div></div> 18.86% |
| 5                    | 146 | <div><div></div></div> 30.93% |
| 6                    | 86  | <div><div></div></div> 18.22% |
| Very satisfied       | 21  | <div><div></div></div> 4.45%  |
| Invalid              | 5   | <div><div></div></div> 1.06%  |
| Total questionnaires | 472 |                               |

26. How satisfied are you with the current living environment by consideration of space and structural safety? [\[Scale questions\]](#)  
**Average score: 1.22**

| Option               | Subtotal | Proportion                    |
|----------------------|----------|-------------------------------|
| Very dissatisfied    | 0        | <div><div></div></div> 0%     |
| 2                    | 4        | <div><div></div></div> 0.85%  |
| 3                    | 18       | <div><div></div></div> 3.81%  |
| 4                    | 62       | <div><div></div></div> 13.14% |
| 5                    | 209      | <div><div></div></div> 44.28% |
| 6                    | 137      | <div><div></div></div> 29.03% |
| Very satisfied       | 38       | <div><div></div></div> 8.05%  |
| Invalid              | 4        | <div><div></div></div> 0.85%  |
| Total questionnaires | 472      |                               |

27. How satisfied are you with the indoor thermal environment for a whole year? [\[Scale questions\]](#)  
**Average score: 0.85**

| Option               | Subtotal | Proportion                    |
|----------------------|----------|-------------------------------|
| Very dissatisfied    | 2        | <div><div></div></div> 0.42%  |
| 2                    | 13       | <div><div></div></div> 2.75%  |
| 3                    | 60       | <div><div></div></div> 12.71% |
| 4                    | 66       | <div><div></div></div> 13.98% |
| 5                    | 183      | <div><div></div></div> 38.77% |
| 6                    | 119      | <div><div></div></div> 25.21% |
| Very satisfied       | 23       | <div><div></div></div> 4.87%  |
| Invalid              | 6        | <div><div></div></div> 1.27%  |
| Total questionnaires | 472      |                               |

28. How satisfied are you with the ventilation of your house? [\[Scale questions\]](#)  
**Average score: 1.15**

| Option            | Subtotal | Proportion                    |
|-------------------|----------|-------------------------------|
| Very dissatisfied | 0        | <div><div></div></div> 0%     |
| 2                 | 5        | <div><div></div></div> 1.06%  |
| 3                 | 30       | <div><div></div></div> 6.36%  |
| 4                 | 72       | <div><div></div></div> 15.25% |
| 5                 | 193      | <div><div></div></div> 40.89% |
| 6                 | 117      | <div><div></div></div> 24.79% |

|                      |     |                               |
|----------------------|-----|-------------------------------|
| Very satisfied       | 51  | <div><div></div></div> 10.81% |
| Invalid              | 4   | <div><div></div></div> 0.85%  |
| Total questionnaires | 472 |                               |

29. How satisfied are you with the illumination of your dwelling? [\[Scale questions\]](#)  
**Average score: 0.85**

| Option               | Subtotal | Proportion                    |
|----------------------|----------|-------------------------------|
| Very dissatisfied    | 7        | <div><div></div></div> 1.48%  |
| 2                    | 10       | <div><div></div></div> 2.12%  |
| 3                    | 64       | <div><div></div></div> 13.56% |
| 4                    | 62       | <div><div></div></div> 13.14% |
| 5                    | 173      | <div><div></div></div> 36.65% |
| 6                    | 125      | <div><div></div></div> 26.48% |
| Very satisfied       | 27       | <div><div></div></div> 5.72%  |
| Invalid              | 4        | <div><div></div></div> 0.85%  |
| Total questionnaires | 472      |                               |

30. How satisfied are you with sound insulation of your dwelling? [\[Scale questions\]](#)  
**Average score: 0.51**

| Option               | Subtotal | Proportion                    |
|----------------------|----------|-------------------------------|
| Very dissatisfied    | 6        | <div><div></div></div> 1.27%  |
| 2                    | 29       | <div><div></div></div> 6.14%  |
| 3                    | 87       | <div><div></div></div> 18.43% |
| 4                    | 84       | <div><div></div></div> 17.8%  |
| 5                    | 142      | <div><div></div></div> 30.08% |
| 6                    | 94       | <div><div></div></div> 19.92% |
| Very satisfied       | 23       | <div><div></div></div> 4.87%  |
| Invalid              | 7        | <div><div></div></div> 1.48%  |
| Total questionnaires | 472      |                               |

31. How satisfied are you with the overall living environment of your village (air quality, facility convenience, neighborhood relationship)? [\[Scale questions\]](#)  
**Average score: 1.14**

| Option               | Subtotal | Proportion                    |
|----------------------|----------|-------------------------------|
| Very dissatisfied    | 0        | <div><div></div></div> 0%     |
| 2                    | 7        | <div><div></div></div> 1.48%  |
| 3                    | 19       | <div><div></div></div> 4.03%  |
| 4                    | 80       | <div><div></div></div> 16.95% |
| 5                    | 187      | <div><div></div></div> 39.62% |
| 6                    | 144      | <div><div></div></div> 30.51% |
| Very satisfied       | 29       | <div><div></div></div> 6.14%  |
| Invalid              | 6        | <div><div></div></div> 1.27%  |
| Total questionnaires | 472      |                               |



32. In terms of thermal comfort, how do you feel now? [\[Scale questions\]](#)

Average score: 0.82

| Option               | Subtotal | Proportion         |
|----------------------|----------|--------------------|
| Cold                 | 0        | <div></div> 0%     |
| Cool                 | 8        | <div></div> 1.69%  |
| Slightly cool        | 14       | <div></div> 2.97%  |
| Neutral              | 151      | <div></div> 31.99% |
| Slightly warm        | 192      | <div></div> 40.68% |
| Warm                 | 89       | <div></div> 18.86% |
| Hot                  | 15       | <div></div> 3.18%  |
| Invalid              | 3        | <div></div> 0.64%  |
| Total questionnaires | 472      |                    |

33. Do you think the current indoor thermal environment is acceptable: [\[Scale questions\]](#)

Average score: 1.03

| Option               | Subtotal | Proportion         |
|----------------------|----------|--------------------|
| Clearly unacceptable | 1        | <div></div> 0.21%  |
| 2                    | 4        | <div></div> 0.85%  |
| 3                    | 31       | <div></div> 6.57%  |
| 4                    | 94       | <div></div> 19.92% |
| 5                    | 192      | <div></div> 40.68% |
| 6                    | 103      | <div></div> 21.82% |
| Clearly acceptable   | 41       | <div></div> 8.69%  |
| Invalid              | 6        | <div></div> 1.27%  |
| Total questionnaires | 472      |                    |

34. You want the indoor temperature to become now [\[Scale questions\]](#)

Average score: 0.73

| Option               | Subtotal | Proportion         |
|----------------------|----------|--------------------|
| Warm more            | 2        | <div></div> 0.42%  |
| Remain the same      | 123      | <div></div> 26.06% |
| Cool more            | 341      | <div></div> 72.25% |
| Invalid              | 6        | <div></div> 1.27%  |
| Total questionnaires | 472      |                    |

35. Your comfort evaluation of indoor thermal environment (taking temperature, humidity, wind sensation into consideration) [\[Scale questions\]](#)

Average score: 0.76

| Option                 | Subtotal | Proportion         |
|------------------------|----------|--------------------|
| Be hard to bear        | 6        | <div></div> 1.27%  |
| Very uncomfortable     | 24       | <div></div> 5.08%  |
| Uncomfortable          | 118      | <div></div> 25%    |
| A little uncomfortable | 249      | <div></div> 52.75% |

|                      |     |                               |
|----------------------|-----|-------------------------------|
| Comfortable          | 71  | <div><div></div></div> 15.04% |
| Invalid              | 4   | <div><div></div></div> 0.85%  |
| Total questionnaires | 468 |                               |

36. What measures are you using now to improve your comfort level: [\[Multiple choice questions\]](#)

| Option                                  | Subtotal | Proportion                    |
|-----------------------------------------|----------|-------------------------------|
| Shade from the sun (avoid too much sun) | 30       | <div><div></div></div> 6.36%  |
| Windows that can be switched on and off | 272      | <div><div></div></div> 57.63% |
| Room temperature controller             | 5        | <div><div></div></div> 1.06%  |
| Electric heater                         | 12       | <div><div></div></div> 2.54%  |
| Humidifier                              | 10       | <div><div></div></div> 2.12%  |
| Air conditioner                         | 181      | <div><div></div></div> 38.35% |
| Fan                                     | 411      | <div><div></div></div> 87.08% |
| Increase or decrease in clothes         | 123      | <div><div></div></div> 26.06% |
| The above are no                        | 5        | <div><div></div></div> 1.06%  |
| Others:                                 | 7        | <div><div></div></div> 1.48%  |
| Invalid                                 | 6        | <div><div></div></div> 1.27%  |
| Total questionnaires                    | 472      |                               |

37. Your assessment of the wind in the room: [\[Scale questions\]](#)  
**Average score: 1.06**

| Option                             | Subtotal | Proportion                    |
|------------------------------------|----------|-------------------------------|
| There is no wind                   | 102      | <div><div></div></div> 21.61% |
| There is a slight wind sensation   | 243      | <div><div></div></div> 51.48% |
| There is a distinct wind sensation | 109      | <div><div></div></div> 23.09% |
| There is a strong wind feeling     | 11       | <div><div></div></div> 2.33%  |
| Invalid                            | 7        | <div><div></div></div> 1.48%  |
| Total questionnaires               | 465      |                               |

38. Your assessment of the intensity of odors in the room: [\[Scale questions\]](#)  
**Average score: -0.57**

| Option               | Subtotal | Proportion                    |
|----------------------|----------|-------------------------------|
| No odor              | 274      | <div><div></div></div> 58.05% |
| Slight odor          | 124      | <div><div></div></div> 26.27% |
| Medium odor          | 54       | <div><div></div></div> 11.44% |
| A strong odor        | 9        | <div><div></div></div> 1.91%  |
| An unbearable odor   | 1        | <div><div></div></div> 0.21%  |
| Invalid              | 10       | <div><div></div></div> 2.12%  |
| Total questionnaires | 462      |                               |

39. Your assessment of the light environment (brightness): [\[Scale questions\]](#)  
**Average score: 0.08**

| Option               | Subtotal | Proportion                    |
|----------------------|----------|-------------------------------|
| Too dark             | 11       | <div><div></div></div> 2.33%  |
| Slightly dark        | 99       | <div><div></div></div> 20.97% |
| Neutral              | 201      | <div><div></div></div> 42.58% |
| Slightly bright      | 150      | <div><div></div></div> 31.78% |
| Too bright           | 4        | <div><div></div></div> 0.85%  |
| Invalid              | 7        | <div><div></div></div> 1.48%  |
| Total questionnaires | 465      |                               |

40. Regarding the indoor environment you are in, the environmental factors that you feel most affect your satisfaction, satisfaction and dissatisfaction are respectively: [\[Multiple choice questions\]](#)

| The title \ options                 | Temperature | Humidity    | Wind speed  | Acoustic    | Light       | air quality | Others    | Invalid    |
|-------------------------------------|-------------|-------------|-------------|-------------|-------------|-------------|-----------|------------|
| Most impact on overall satisfaction | 279(59.11%) | 166(35.17%) | 157(33.26%) | 184(38.98%) | 240(50.85%) | 215(45.55%) | 19(4.03%) | 79(16.74%) |
| The most satisfied                  | 224(47.46%) | 162(34.32%) | 138(29.24%) | 124(26.27%) | 217(45.97%) | 208(44.07%) | 5(1.06%)  | 14(2.97%)  |
| The most unsatisfied                | 98(20.76%)  | 84(17.8%)   | 77(16.31%)  | 203(43.01%) | 118(25%)    | 57(12.08%)  | 33(6.99%) | 32(6.78%)  |

41. Please mark your daily timetable in the form below. [\[Matrix text questions\]](#)

42. If you have a fan, a heater, an air conditioner, how to use it in summer and winter? If no, please skip this question. How would you open it? [\[Multiple choice questions\]](#)

| Option                 | Subtotal | Proportion                    |
|------------------------|----------|-------------------------------|
| Never opening          | 15       | <div><div></div></div> 3.18%  |
| Always opening         | 50       | <div><div></div></div> 10.59% |
| When entering the room | 68       | <div><div></div></div> 14.41% |
| When feeling hot/cold  | 373      | <div><div></div></div> 79.03% |
| When there is a guest  | 168      | <div><div></div></div> 35.59% |
| When going to bed      | 118      | <div><div></div></div> 25%    |
| At certain time        | 2        | <div><div></div></div> 0.42%  |
| Others                 | 1        | <div><div></div></div> 0.21%  |
| Invalid                | 25       | <div><div></div></div> 5.3%   |
| Total questionnaires   | 472      |                               |

43. If you have a fan, a heater, an air conditioner, how to use it in summer and winter? If no, please skip this question. How would you close it? [\[Multiple choice questions\]](#)

| Option                | Subtotal | Proportion                    |
|-----------------------|----------|-------------------------------|
| Never closing         | 7        | <div><div></div></div> 1.48%  |
| When leaving the room | 93       | <div><div></div></div> 19.7%  |
| When leaving home     | 140      | <div><div></div></div> 29.66% |
| When feeling hot/cold | 353      | <div><div></div></div> 74.79% |
| Before sleeping       | 120      | <div><div></div></div> 25.42% |
| After getting up      | 106      | <div><div></div></div> 22.46% |

|                            |     |                              |
|----------------------------|-----|------------------------------|
| At certain time            | 4   | <div><div></div></div> 0.85% |
| After opening for    hours | 7   | <div><div></div></div> 1.48% |
| Others                     | 0   | <div><div></div></div> 0%    |
| Invalid                    | 36  | <div><div></div></div> 7.63% |
| Total questionnaires       | 472 |                              |

44. How do you operate electric cooling and heating equipment (fan, air conditioner, oil heater, electric heater, heater)? If no, please skip this question.  
[\[Multiple choice questions\]](#)

| Option                                                                  | Subtotal | Proportion                    |
|-------------------------------------------------------------------------|----------|-------------------------------|
| Never opening                                                           | 27       | <div><div></div></div> 5.72%  |
| Turn it on when entering the room and turn it off when leaving the room | 109      | <div><div></div></div> 23.09% |
| Turn it on when feeling hot/cold, turn it off when leaving the room     | 360      | <div><div></div></div> 76.27% |
| Turn it on when you wake up and turn it off when you're dressed         | 89       | <div><div></div></div> 18.86% |
| Others                                                                  | 2        | <div><div></div></div> 0.42%  |
| Invalid                                                                 | 60       | <div><div></div></div> 12.71% |
| Total questionnaires                                                    | 472      |                               |

45. Can windows of your building (living room/bedroom1, 2, 3) be opened?  
If yes, please answer this question-how do you open or close it in winter; if no, please skip this question.

How would you open it? [\[Multiple choice questions\]](#)

| Option                       | Subtotal | Proportion                    |
|------------------------------|----------|-------------------------------|
| Never opening                | 40       | <div><div></div></div> 8.47%  |
| Always opening               | 50       | <div><div></div></div> 10.59% |
| When leaving home            | 52       | <div><div></div></div> 11.02% |
| After getting up             | 51       | <div><div></div></div> 10.81% |
| When entering the room       | 51       | <div><div></div></div> 10.81% |
| When AC off                  | 91       | <div><div></div></div> 19.28% |
| When feeling hot             | 248      | <div><div></div></div> 52.54% |
| When smelly or stuffy indoor | 325      | <div><div></div></div> 68.86% |
| When sunny or warm outdoor   | 253      | <div><div></div></div> 53.6%  |
| At certain time              | 2        | <div><div></div></div> 0.42%  |
| Others                       | 2        | <div><div></div></div> 0.42%  |
| Invalid                      | 18       | <div><div></div></div> 3.81%  |
| Total questionnaires         | 472      |                               |

46. Can windows of your building (living room/bedroom1, 2, 3) be opened?  
If yes, please answer this question-how do you open or close it in summer; if no, please skip this question.

How would you open it?  
[\[Multiple choice questions\]](#)

| Option        | Subtotal | Proportion                   |
|---------------|----------|------------------------------|
| Never opening | 4        | <div><div></div></div> 0.85% |

|                              |     |                               |
|------------------------------|-----|-------------------------------|
| Always opening               | 165 | <div><div></div></div> 34.96% |
| When leaving home            | 39  | <div><div></div></div> 8.26%  |
| After getting up             | 48  | <div><div></div></div> 10.17% |
| When entering the room       | 65  | <div><div></div></div> 13.77% |
| When AC off                  | 90  | <div><div></div></div> 19.07% |
| When feeling hot             | 263 | <div><div></div></div> 55.72% |
| When smelly or stuffy indoor | 275 | <div><div></div></div> 58.26% |
| When sunny or warm outdoor   | 174 | <div><div></div></div> 36.86% |
| At certain time              | 1   | <div><div></div></div> 0.21%  |
| Others                       | 1   | <div><div></div></div> 0.21%  |
| Invalid                      | 16  | <div><div></div></div> 3.39%  |
| Total questionnaires         | 472 |                               |

47. Can windows of your building (living room/bedroom1, 2, 3) be opened?  
If yes, please answer this question-how do you open or close it in winter; if no, please skip this question.

How would you close it?  
[\[Multiple choice questions\]](#)

| Option                                                 | Subtotal | Proportion                    |
|--------------------------------------------------------|----------|-------------------------------|
| Never closing                                          | 16       | <div><div></div></div> 3.39%  |
| When leaving home                                      | 103      | <div><div></div></div> 21.82% |
| Before sleeping                                        | 114      | <div><div></div></div> 24.15% |
| When entering the room                                 | 86       | <div><div></div></div> 18.22% |
| When AC on                                             | 164      | <div><div></div></div> 34.75% |
| When feeling cold                                      | 288      | <div><div></div></div> 61.02% |
| Bad outdoor environment (wind/rain/dust weather/noisy) | 292      | <div><div></div></div> 61.86% |
| At certain time                                        | 0        | <div><div></div></div> 0%     |
| After opening for    hours                             | 3        | <div><div></div></div> 0.64%  |
| Others                                                 | 1        | <div><div></div></div> 0.21%  |
| Invalid                                                | 16       | <div><div></div></div> 3.39%  |
| Total questionnaires                                   | 472      |                               |

48. When will you turning on lighting devices in living room and bedroom?

[\[Multiple choice questions\]](#)

| Option                            | Subtotal | Proportion                    |
|-----------------------------------|----------|-------------------------------|
| Turning on once entering the room | 104      | <div><div></div></div> 22.03% |
| When it's too dark                | 419      | <div><div></div></div> 88.77% |
| Others                            | 1        | <div><div></div></div> 0.21%  |
| Invalid                           | 17       | <div><div></div></div> 3.6%   |
| Total questionnaires              | 472      |                               |

49. When will you turning off lighting devices in living room and bedroom?

[Multiple choice questions]

| Option                      | Subtotal | Proportion                    |
|-----------------------------|----------|-------------------------------|
| When leaving room           | 259      | <div><div></div></div> 54.87% |
| Before sleeping             | 349      | <div><div></div></div> 73.94% |
| When bright during daytime  | 354      | <div><div></div></div> 75%    |
| When watching TV or a movie | 61       | <div><div></div></div> 12.92% |
| Others                      | 2        | <div><div></div></div> 0.42%  |
| Invalid                     | 13       | <div><div></div></div> 2.75%  |
| Total questionnaires        | 472      |                               |

End of this survey, thanks for your participation.
